# Supplementary material for: Fatty Acid Profile and Escherichia coli and Salmonella sp. Load of Wild-Caught Seaweed Fly Fucellia maritima (Haliday, 1838) (Diptera: Anthomyiidae)
Source: MDPI journal article supplement (doi:10.3390/insects15030163), 2024-02-28
Supplement: s1 [file s1]

Supplementary material

Communication

# Fatty Acid Profile and *Escherichia coli* and *Salmonella* sp. Load of Wild-Caught Seaweed Fly *Fucellia maritima* (Haliday, 1838) (Diptera: Anthomyiidae)

**Table S1.** Raw data of relative abundance (%) of fatty acids (FAs) present in the adult flies of *Fucellia maritima*. Each Area is one replicate.

| Peaks | Area 1 | Area 2 | Area 3 | Area 4 | Area 5 | Mean  | Deviation |
|-------|--------|--------|--------|--------|--------|-------|-----------|
| C12:0 | 0.01   | 0.10   | 0.05   | NA     | 0.05   | 0.04  | 0.04      |
| C14:0 | 0.68   | 1.51   | 1.17   | 0.37   | 0.90   | 0.93  | 0.44      |
| C14:1 | 0.26   | 0.39   | 0.18   | 0.08   | 0.25   | 0.23  | 0.11      |
| C15:0 | 0.16   | 0.41   | 0.48   | 0.34   | 0.37   | 0.35  | 0.12      |
| C15:1 | NA     | 0.14   | 0.11   | NA     | 0.23   | 0.10  | 0.10      |
| C16:0 | 14.62  | 15.61  | 16.89  | 11.82  | 15.45  | 14.88 | 1.89      |
| C16:1 | 31.11  | 36.95  | 31.33  | 33.80  | 41.42  | 34.92 | 4.33      |
| C17:0 | 0.14   | 0.23   | 0.34   | 0.29   | 0.13   | 0.23  | 0.09      |
| C17:1 | 0.65   | 1.26   | 1.21   | 1.42   | 1.69   | 1.25  | 0.38      |
| C18:0 | 2.72   | 2.23   | 2.89   | 2.34   | 1.73   | 2.38  | 0.45      |
| C18:1 | 33.39  | 29.27  | 28.03  | 32.36  | 28.93  | 30.40 | 2.34      |
| C18:2 | 5.21   | 2.66   | 3.72   | 3.73   | 1.71   | 3.40  | 1.31      |
| C18:3 | 2.43   | 2.91   | 5.55   | 5.00   | 1.05   | 3.39  | 1.86      |
| C20:4 | 1.70   | 0.91   | 0.95   | 0.97   | 0.97   | 1.10  | 0.34      |
| C20:5 | 6.67   | 4.99   | 6.87   | 7.14   | 4.66   | 6.07  | 1.15      |
| w3    | 9.10   | 7.91   | 12.41  | 12.14  | 5.70   | 9.45  | 1.23      |
| w6    | 6.91   | 3.57   | 4.67   | 4.70   | 2.68   | 4.51  | 0.91      |
| w6/w3 | 0.76   | 0.45   | 0.38   | 0.39   | 0.47   | 0.49  | 0.14      |

**Table S2.** Raw data of the quantification of phospholipids present in the adult flies of *Fucellia maritima*

|                      |    | Average | ug P   | ug lipid | Sum     | %       |
|----------------------|----|---------|--------|----------|---------|---------|
| <b>F. maritima_1</b> | CL | 0.1476  | 0.2148 | 5.3695   | 59.3485 | 9.0548  |
|                      | PA | 0.0712  | 0.0446 | 1.1146   |         | 1.8796  |
|                      | PC | 0.2366  | 0.4132 | 10.3294  |         | 17.4188 |
|                      | PE | 0.6922  | 1.4289 | 35.7222  |         | 60.2399 |

|                      |    |        |        |         |         |         |
|----------------------|----|--------|--------|---------|---------|---------|
| <b>F. maritima_2</b> | PI | 0.1140 | 0.1399 | 3.4970  |         | 5.8971  |
|                      | PS | 0.1107 | 0.1326 | 3.3159  |         | 5.5917  |
|                      | CL | 0.1312 | 0.1782 | 4.4555  | 58.3649 | 7.6293  |
|                      | PA | 0.0741 | 0.0509 | 1.2734  |         | 2.1805  |
|                      | PC | 0.2277 | 0.3933 | 9.8334  |         | 16.8380 |
|                      | PE | 0.6944 | 1.4338 | 35.8449 |         | 61.3782 |
|                      | PI | 0.1125 | 0.1365 | 3.4134  |         | 5.8449  |
|                      | PS | 0.1148 | 0.1418 | 3.5444  |         | 6.0691  |

---
